# Supplementary material for: The association between oxidative balance score and frailty in adults across a wide age spectrum: NHANES 2007–2018
Source: Royal Society of Chemistry journal article supplement (doi:10.1039/d4fo00870g), 2024-01-01
Supplement: d4fo00870g1.pdf [file d4fo00870g1.pdf]

Table S1 36-item Frailty Index

| Self-reported Frailty Index items                  | Laboratory Frailty Index items                     |
|----------------------------------------------------|----------------------------------------------------|
| 1. Angina/angina pectoris                          | 26. Pulse rate (60-99 bpm)                         |
| 2. Heart attack                                    | 27. Systolic blood pressure (90-140 mmHg)          |
| 3. Coronary heart disease                          | 28. Pulse pressure (30-60 mmHg)                    |
| 4. Stroke                                          | 29. Platelet count SI (150-450 unit 1000 cells/uL) |
| 5. Thyroid condition                               | 30. Blood urea nitrogen (3-20 mg/dL)               |
| 6. Cancer                                          | 31. Bicarbonate ( $\leq 28$ mmol/L)                |
| 7. Arthritis                                       | 32. Red cell distribution width ( $\leq 14.6\%$ )  |
| 8. High blood pressure                             | 33. Lactate dehydrogenase ( $\leq 190$ U/L)        |
| 9. Diabetes mellitus                               | 34. Alkaline phosphatase ( $\leq 115$ U/L)         |
| 10. Weak/failing kidneys                           | 35. Uric acid (M: 240-510, F: 160-430 umol/L)      |
| 11. Confusion or inability to remember things      | 36. Total calcium (2.0-2.5 mmol/L)                 |
| 12. Difficulty managing money                      |                                                    |
| 13. Difficulty stooping, crouching, kneeling       |                                                    |
| 14. Difficulty lifting or carrying                 |                                                    |
| 15. Difficulty walking between rooms on same floor |                                                    |
| 16. Difficulty standing up from an armless chair   |                                                    |
| 17. Difficulty getting in and out of bed           |                                                    |
| 18. Difficulty dressing yourself                   |                                                    |

19. Difficulty grasping/holding small objects

20. Difficulty attending social events

21. Self-reported health

22. Frequency of healthcare use

23. Health compared to 1 year ago

24. Overnight hospital stays

25. Medications

---

F

=

female;

M

=

male

Table S2 Oxidative balance score assignment scheme.

| OBS components                | Property     | Scoring assignment |           |           |
|-------------------------------|--------------|--------------------|-----------|-----------|
|                               |              | 0                  | 1         | 2         |
| <b>Dietary OBS components</b> |              |                    |           |           |
| Vitamin C (mg)                | Anti-oxidant | Tertile 1          | Tertile 2 | Tertile 3 |
| Vitamin E (mg)                | Anti-oxidant | Tertile 1          | Tertile 2 | Tertile 3 |
| Vitamin B6 (mg)               | Anti-oxidant | Tertile 1          | Tertile 2 | Tertile 3 |
| Vitamin B12 (mg)              | Anti-oxidant | Tertile 1          | Tertile 2 | Tertile 3 |
| Zinc (mg)                     | Anti-oxidant | Tertile 1          | Tertile 2 | Tertile 3 |
| Selenium (µg)                 | Anti-oxidant | Tertile 1          | Tertile 2 | Tertile 3 |
| Carotenoid (µg)               | Anti-oxidant | Tertile 1          | Tertile 2 | Tertile 3 |
| Niacin (mg)                   | Anti-oxidant | Tertile 1          | Tertile 2 | Tertile 3 |
| Copper (mg)                   | Anti-oxidant | Tertile 1          | Tertile 2 | Tertile 3 |
| Dietary fiber (gm)            | Anti-oxidant | Tertile 1          | Tertile 2 | Tertile 3 |
| Calcium (mg)                  | Anti-oxidant | Tertile 1          | Tertile 2 | Tertile 3 |
| Magnesium (mg)                | Anti-oxidant | Tertile 1          | Tertile 2 | Tertile 3 |
| Total folate (mcg)            | Anti-oxidant | Tertile 1          | Tertile 2 | Tertile 3 |
| Riboflavin (mg)               | Anti-oxidant | Tertile 1          | Tertile 2 | Tertile 3 |
| Iron (mg)                     | Pro-oxidant  | Tertile 3          | Tertile 2 | Tertile 1 |

|                                      |              |           |           |           |
|--------------------------------------|--------------|-----------|-----------|-----------|
| Total fat (gm)                       | Pro-oxidant  | Tertile 3 | Tertile 2 | Tertile 1 |
| <b>Lifestyle OBS components</b>      |              |           |           |           |
| Cotinine (ng/ml)                     | Pro-oxidant  | Tertile 3 | Tertile 2 | Tertile 1 |
| Alcohol (g/day)                      | Pro-oxidant  | >30.0     | 0.1-30.0  | 0.0       |
| Body mass index (kg/m <sup>2</sup> ) | Pro-oxidant  | ≥30.0     | 25.0-29.9 | <25.0     |
| Physical activity (MET-minute/week)  | Anti-oxidant | <600      | 600-3000  | >3000     |

---

Table S3 Demographic characteristics stratified by the presence or absence of frailty

(n = 22,914).

|                             | Overall<br>(n=22914) | Frailty<br>(n=4934) | Fit<br>(n=17980) | <i>P</i>         |
|-----------------------------|----------------------|---------------------|------------------|------------------|
| <b>Energy intake (kcal)</b> | 2115.14(9.24)        | 1894.72(16.90)      | 2158.32(10.16)   | <b>&lt;0.001</b> |
| <b>OBS</b>                  | 20.19(0.12)          | 17.95(0.16)         | 20.63(0.12)      | <b>0.001</b>     |
| <b>Dietary OBS</b>          | 15.67(0.10)          | 13.93(0.14)         | 16.01(0.11)      | <b>&lt;0.001</b> |
| <b>Lifestyle OBS</b>        | 4.52(0.02)           | 4.02(0.04)          | 4.62(0.03)       | <b>&lt;0.001</b> |
| <b>Sex</b>                  |                      |                     |                  | <b>&lt;0.001</b> |
| Male                        | 11428(49.53)         | 2271(42.28)         | 9157(50.95)      |                  |
| Female                      | 11486(50.47)         | 2663(57.72)         | 8823(49.05)      |                  |
| <b>Age</b>                  |                      |                     |                  | <b>&lt;0.001</b> |
| 20-39                       | 7729(37.87)          | 249(6.77)           | 7480(43.96)      |                  |
| 40-64                       | 9976(44.96)          | 2002(44.12)         | 7974(45.12)      |                  |
| ≥65                         | 5209(17.18)          | 2683(49.10)         | 2526(10.92)      |                  |
| <b>Race</b>                 |                      |                     |                  | <b>&lt;0.001</b> |
| Non-Hispanic White          | 10118(67.70)         | 2496(72.14)         | 7622(66.83)      |                  |
| Other                       | 12796(32.30)         | 2438(27.86)         | 10358(33.17)     |                  |
| <b>Education level</b>      |                      |                     |                  | <b>&lt;0.001</b> |
| Below high school           | 5209(14.47)          | 1621(22.68)         | 3588(12.86)      |                  |
| High school                 | 5215(22.70)          | 1257(28.23)         | 3958(21.62)      |                  |

|                             |              |             |              |                  |
|-----------------------------|--------------|-------------|--------------|------------------|
| Above high school           | 12490(62.83) | 2056(49.09) | 10434(65.52) |                  |
| <b>Marital status</b>       |              |             |              | <b>&lt;0.001</b> |
| Married/living with partner | 9099(63.05)  | 2332(43.27) | 6767(35.72)  |                  |
| Other                       | 13815(36.95) | 2602(56.73) | 11213(64.28) |                  |
| <b>Poverty-income ratio</b> |              |             |              | <b>&lt;0.001</b> |
| ≤1.30                       | 7162(21.97)  | 2030(32.09) | 5132(19.99)  |                  |
| 1.31-3.50                   | 8646(34.82)  | 1966(40.56) | 6680(33.70)  |                  |
| >3.50                       | 7106(43.21)  | 938(27.35)  | 6168(46.31)  |                  |

---

Continuous variables were expressed with means (standard error) and categorical variables were described with frequencies (percentages). Continuous variables were compared using T test and categorical variables were using chi-square tests.  $P<0.05$  was set as the threshold of statistical significance and marked in bold values.
